# Supplementary material for: The gut fungal and bacterial microbiota in pediatric patients with inflammatory bowel disease introduced to treatment with anti-tumor necrosis factor-α
Source: PubMed Central journal article supplement (PMC9033777; doi:10.1038/s41598-022-10548-7), 2022-04-22

### Supplementary Figure 1.

Diversity and richness at the different timepoints stratified by response to infliximab therapy of A. gut mycobiota and B. gut bacterial microbiota in pediatric IBD patients.

R = responder and NR = non-responder to infliximab

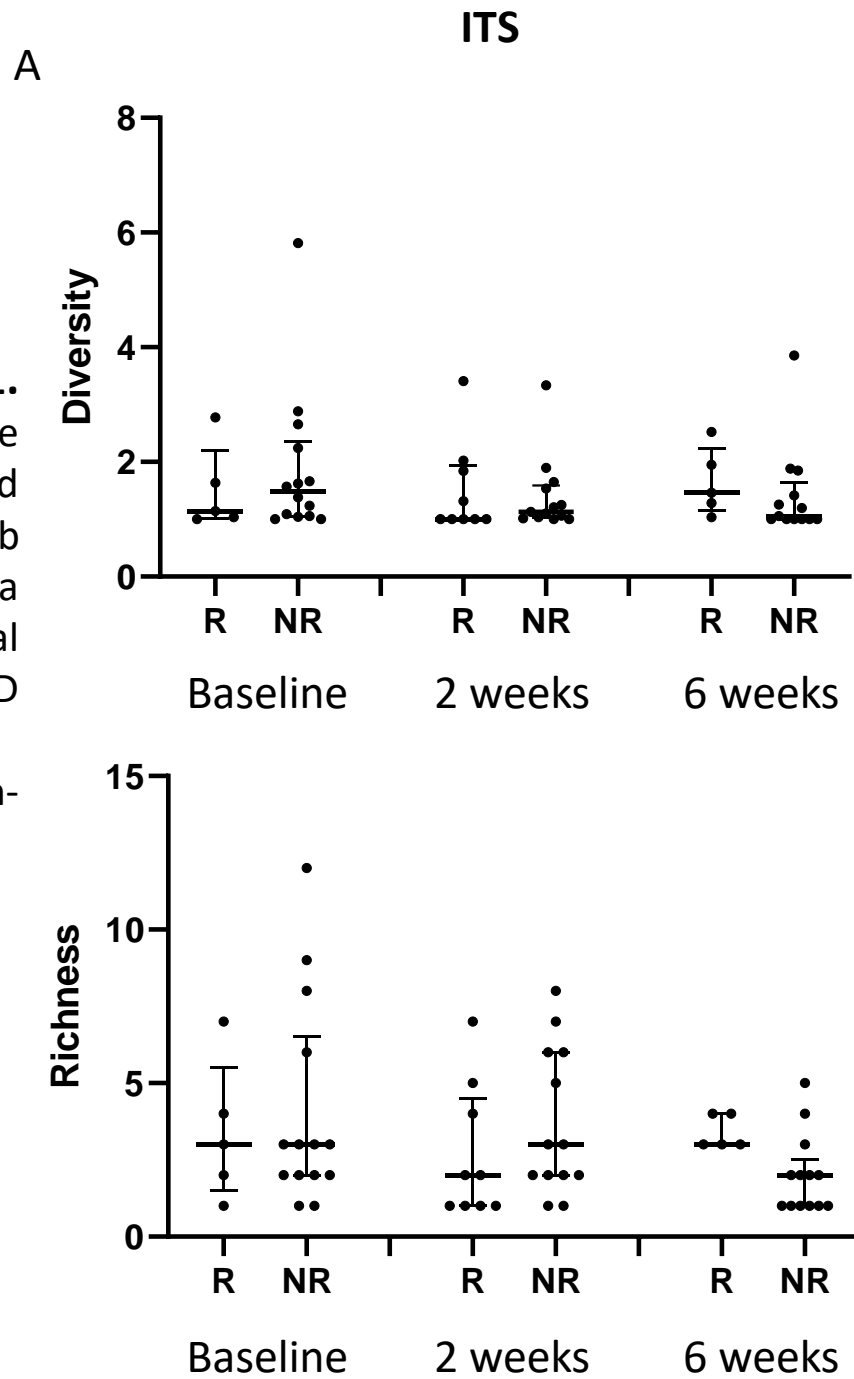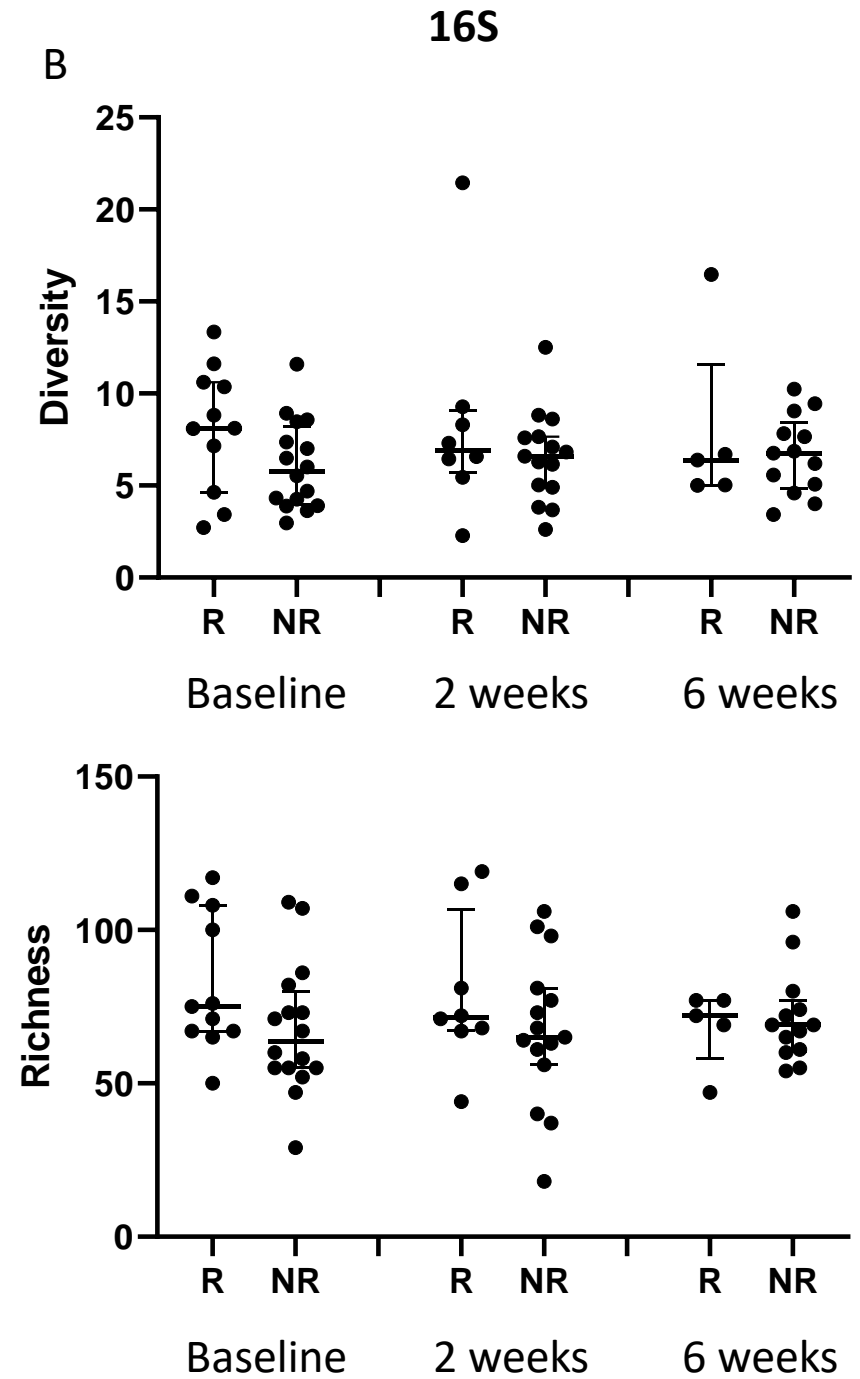

Supplement: 41598_2022_10548_MOESM1_ESM.pdf [file 41598_2022_10548_MOESM1_ESM.pdf]
